# Supplementary material for: Comparative study of the intermolecular dynamics of imidazolium-based ionic liquids with linear and branched alkyl chains: OHD-RIKES measurements
Source: Royal Society of Chemistry journal article supplement (doi:10.1039/c6cp08263g), 2017-01-01

## Comparative Study of the Intermolecular Dynamics of Imidazolium-Based Ionic Liquids with Linear and Branched Alkyl Chains: OHD-RIKES Measurements

Lianjie Xue, Fermi Bardak, George Tamas, and Edward L. Quitevis\*

Department of Chemistry & Biochemistry

Texas Tech University

Lubbock, TX 79409

### Electronic Supporting Information

**Table S1.** Fitting parameters for the RSD multicomponent line shape analysis

|                 | 1mC <sub>2</sub> C <sub>1</sub> | 2mC <sub>3</sub> C <sub>1</sub> | 3mC <sub>4</sub> C <sub>1</sub> | 4mC <sub>5</sub> C <sub>1</sub> | 5mC <sub>6</sub> C <sub>1</sub> | C <sub>2</sub> C <sub>1</sub> | C <sub>3</sub> C <sub>1</sub> | C <sub>4</sub> C <sub>1</sub> | C <sub>5</sub> C <sub>1</sub> | C <sub>6</sub> C <sub>1</sub> | C <sub>7</sub> C <sub>1</sub> |
|-----------------|---------------------------------|---------------------------------|---------------------------------|---------------------------------|---------------------------------|-------------------------------|-------------------------------|-------------------------------|-------------------------------|-------------------------------|-------------------------------|
| a <sub>BL</sub> | 0.09                            | 0.10                            | 0.06                            | 0.092                           | 0.096                           | 0.105                         | 0.097                         | 0.09                          | 0.09                          | 0.10                          | 0.09                          |
| a               | 1.23                            | 1.17                            | 1.31                            | 1.18                            | 1.18                            | 1.18                          | 1.22                          | 1.22                          | 1.20                          | 1.17                          | 1.19                          |
| w <sub>BL</sub> | 15.01                           | 13.79                           | 16.21                           | 16.00                           | 15.01                           | 14.44                         | 13.28                         | 14.47                         | 16.17                         | 15.09                         | 14.96                         |
| aG <sub>1</sub> | 0.378                           | 0.54                            | 0.57                            | 0.54                            | 0.64                            | 0.22                          | 0.50                          | 0.60                          | 0.52                          | 0.63                          | 0.65                          |
| wG <sub>1</sub> | 54.24                           | 54.85                           | 65.96                           | 60.45                           | 61.92                           | 52.03                         | 54.03                         | 61.17                         | 60.01                         | 63.50                         | 61.44                         |
| e <sub>1</sub>  | 18.85                           | 24.09                           | 22.02                           | 19.85                           | 23.03                           | 16.19                         | 26.54                         | 23.20                         | 19.16                         | 21.07                         | 22.15                         |
| aG <sub>2</sub> | 0.67                            | 0.66                            | 0.78                            | 0.72                            | 0.56                            | 0.79                          | 0.74                          | 0.73                          | 0.76                          | 0.57                          | 0.61                          |
| wG <sub>2</sub> | 88.93                           | 102.12                          | 105.69                          | 95.80                           | 99.82                           | 84.07                         | 98.16                         | 102.87                        | 96.92                         | 97.94                         | 101.06                        |
| e <sub>2</sub>  | 26.01                           | 25.92                           | 21.63                           | 21.07                           | 21.73                           | 28.91                         | 27.58                         | 23.49                         | 21.21                         | 18.49                         | 21.32                         |
| aG <sub>3</sub> | 0.17                            | 0.27                            | 0.13                            | 0.21                            | 0.14                            | 0.17                          | 0.22                          | 0.16                          | 0.23                          | 0.20                          | 0.15                          |
| wG <sub>3</sub> | 121.85                          | 122.28                          | 122.77                          | 122.61                          | 121.38                          | 123.33                        | 122.98                        | 122.04                        | 123.00                        | 122.60                        | 122.96                        |
| e <sub>3</sub>  | 6.12                            | 7.42                            | 5.25                            | 6.61                            | 6.24                            | 7.16                          | 6.98                          | 6.10                          | 7.08                          | 7.31                          | 6.36                          |
| aG <sub>4</sub> | 0.42                            | 0.15                            | 0.019                           | 0.15                            | 0.21                            | 0.22                          | 0.13                          | 0.08                          | 0.16                          | 0.25                          | 0.16                          |
| wG <sub>4</sub> | 142.62                          | 134.42                          | 132.77                          | 136.77                          | 134.42                          | 155.87                        | 138.06                        | 133.47                        | 138.52                        | 136.00                        | 135.13                        |
| e <sub>4</sub>  | 11.86                           | 9.48                            | 4.98                            | 11.59                           | 11.15                           | 18.13                         | 9.15                          | 8.69                          | 10.05                         | 14.72                         | 13.56                         |
| aG <sub>5</sub> | 0.16                            | 0.10                            | 0.12                            | 0.19                            | 0.14                            | 0.08                          | 0.15                          | 0.15                          | 0.20                          | 0.13                          | 0.14                          |
| wG <sub>5</sub> | 167.45                          | 171.72                          | 173.04                          | 170.05                          | 169.79                          | 170.77                        | 166.79                        | 170.45                        | 168.35                        | 170.56                        | 170.90                        |
| e <sub>5</sub>  | 14.88                           | 14.42                           | 15.39                           | 14.46                           | 18.86                           | 21.08                         | 15.53                         | 17.69                         | 14.89                         | 11.06                         | 16.58                         |
| aG <sub>6</sub> | 0.08                            | 0.10                            | 0.07                            | 0.06                            | 0.09                            | 0.06                          | 0.06                          | 0.074                         | 0.065                         | 0.05                          | 0.08                          |
| wG <sub>6</sub> | 206.10                          | 216.41                          | 209.25                          | 211.21                          | 214.60                          | 209.35                        | 221.50                        | 212.13                        | 212.54                        | 209.72                        | 213.26                        |
| e <sub>6</sub>  | 12.38                           | 12.25                           | 12.33                           | 11.32                           | 11.39                           | 9.17                          | 16.71                         | 9.26                          | 16.15                         | 14.52                         | 10.37                         |
| aG <sub>7</sub> | 0.10                            | --                              | 0.027                           | 0.05                            | --                              | 0.09                          | --                            | --                            | --                            | --                            | 0.02                          |
| wG <sub>7</sub> | 242.74                          | --                              | 239.44                          | 227.65                          | --                              | 242.84                        | --                            | --                            | --                            | --                            | 231.33                        |
| e <sub>7</sub>  | 12.15                           | --                              | 6.30                            | 5.48                            | --                              | 12.9                          | --                            | --                            | --                            | --                            | 5.76                          |

<sup>a</sup>a<sub>L</sub>, w<sub>BL</sub>, a – Bucaro-Litowitz parameters (ABL, ω<sub>BL</sub>, a in eq 5-1 of text) ; aG, wG, e – Antisymmetrized-Gaussian parameters (AAG ωAG, ε in eq 5-2 of text).

**Figure S1.** Reduced spectral density (height-normalized) of  $[\text{C}_2\text{C}_1\text{im}][\text{NTf}_2]$  in the  $0\text{-}450\text{ cm}^{-1}$  range obtained by applying the Fourier-transform-deconvolution procedure to the reduced response of the corresponding OHD-RIKES signal.

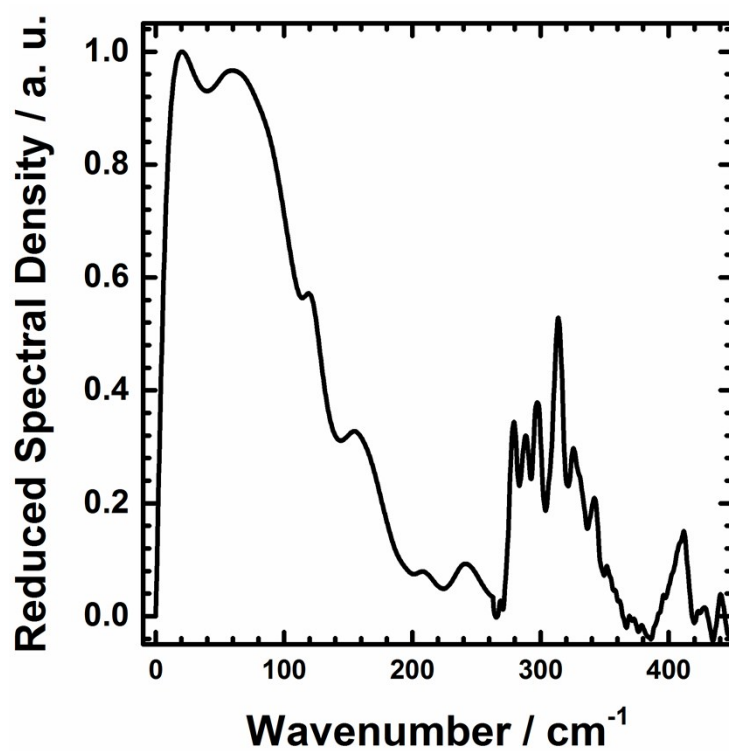

Supplement: c6cp08263g1.pdf [file c6cp08263g1.pdf]
